# Supplementary material
Source: ML conference proceedings conference paper supplement (https://proceedings.neurips.cc/paper_files/paper/2017/hash/3bf55bbad370a8fcad1d09b005e278c2-Abstract.html)
Supplement: Supplementary file [file 3bf55bbad370a8fcad1d09b005e278c2-Supplemental.zip]

# Supplementary Material for *Neural Program Meta-Induction*

## A Karel Examples

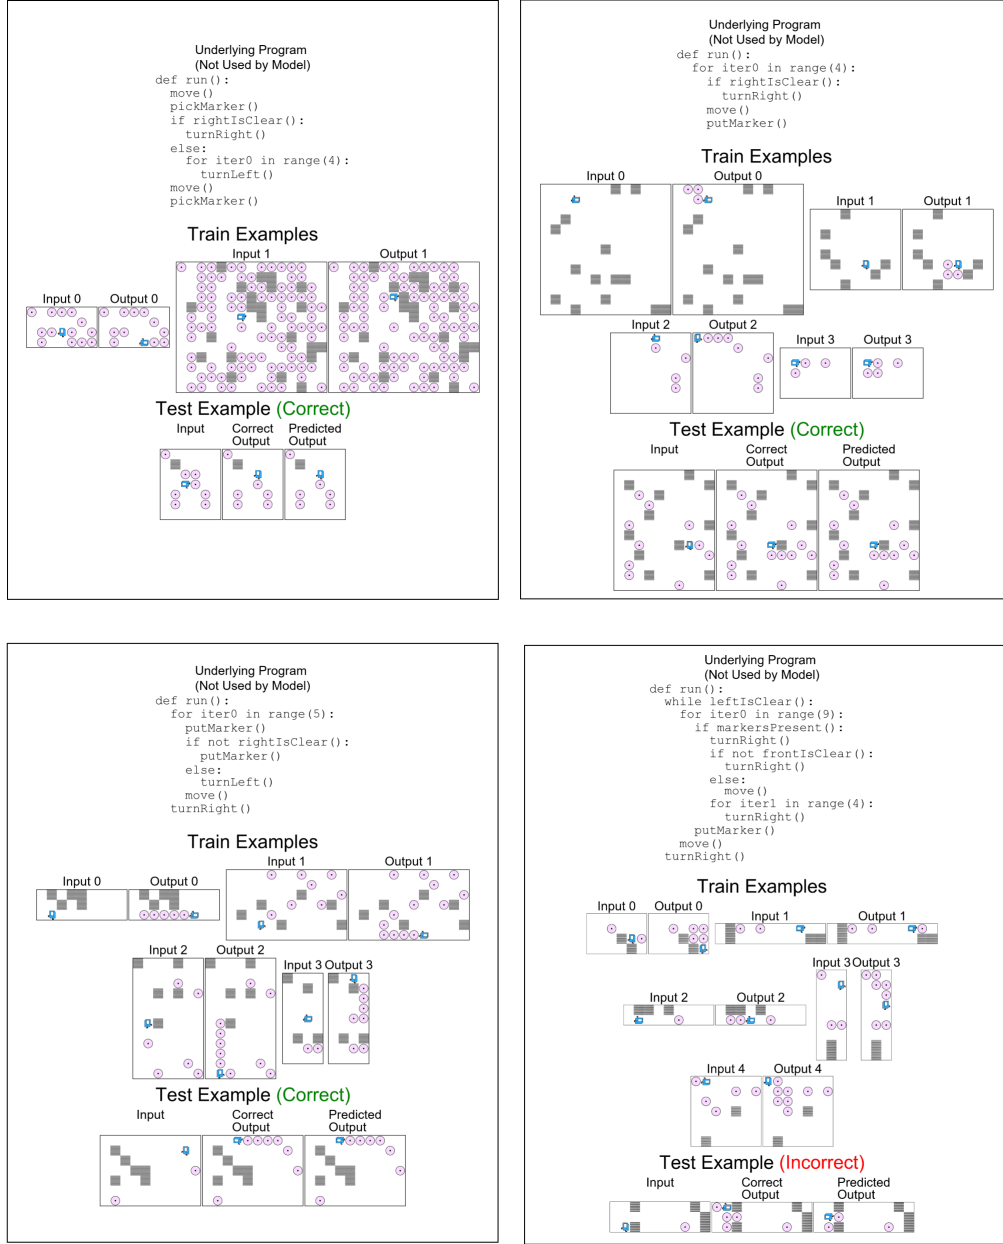

Figure 1: Four Karel instances from our test set, along with output from the META model. The model generates the correct output for the first three, and the incorrect output for the last instance. The underlying program is shown to demonstrate the complexity of the task, although it is not used by the model.
